# Supplementary material for: Engineering the lymph node environment promotes antigen-specific efficacy in type 1 diabetes and islet transplantation
Source: Springer Nature journal article supplement (doi:10.1038/s41467-023-36225-5), 2023-02-08
Supplement: MOESM1 [file 41467_2023_36225_MOESM1_ESM.pdf]

# Engineering the lymph node environment promotes antigen-specific efficacy in type 1 diabetes and islet transplantation

## Supplementary Information

‡Joshua M. Gammon<sup>1</sup>, †Sean T. Carey<sup>1</sup>, Vikas Saxena<sup>2</sup>, Haleigh B. Eppler<sup>1</sup>, Shannon J. Tsai<sup>1</sup>, Christina Paluskievicz<sup>2</sup>, Yanbao Xiong<sup>2</sup>, Lushen Li<sup>2</sup>, Marian Ackun-Farmmer<sup>1</sup>, Lisa H. Tostanoski<sup>1</sup>, Emily A. Gosselin<sup>1</sup>, Alexis A. Yanes<sup>1</sup>, Xiangbin Zeng<sup>1</sup>, Robert S. Oakes<sup>1,3</sup>, \*Jonathan S. Bromberg<sup>2,4</sup>, and \*Christopher M. Jewell<sup>1,2-6</sup>

<sup>1</sup> Fischell Department of Bioengineering, University of Maryland, College Park, 8278 Paint Branch Drive, College Park, MD, 20742, United States

<sup>2</sup> Department of Surgery, University of Maryland Medical School, 22 S. Greene Street, S8B06, Baltimore, MD, 21201, United States

<sup>3</sup> Department of Veterans Affairs, VA Maryland Health Care System, 10. N Green Street, Baltimore, MD 21201, USA

<sup>4</sup> Department of Microbiology and Immunology, University of Maryland Medical School, 685 West 30 Baltimore Street, HSF-I Suite 380, Baltimore, MD, 21201, United States

<sup>5</sup> Robert E. Fischell Institute for Biomedical Devices, 8278 Paint Branch Drive, College Park, MD 20742, United States

<sup>6</sup> Marlene and Stewart Greenebaum Cancer Center, 22 S. Greene Street, Suite N9E17, Baltimore, MD 21201, United States

‡ These authors contributed equally.

Correspondence should be addressed to C.M.J. (email: [cmjewell@umd.edu](mailto:cmjewell@umd.edu)) and J.S.B. (email: [JBromberg@som.umaryland.edu](mailto:JBromberg@som.umaryland.edu))

**a** BDC2.5 and Eα co-culture (CD4)

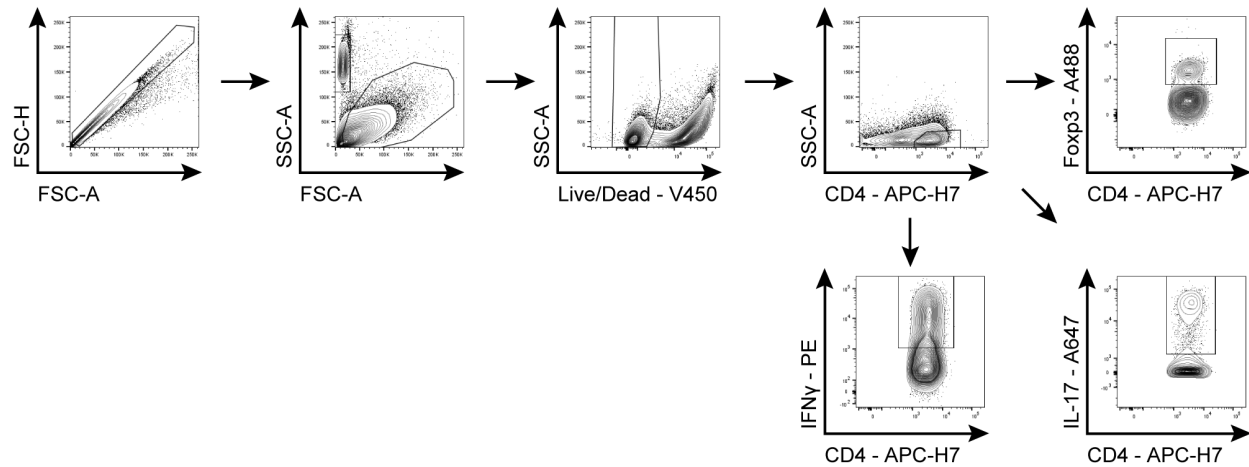

**b** NRP-V7 co-culture (CD8)

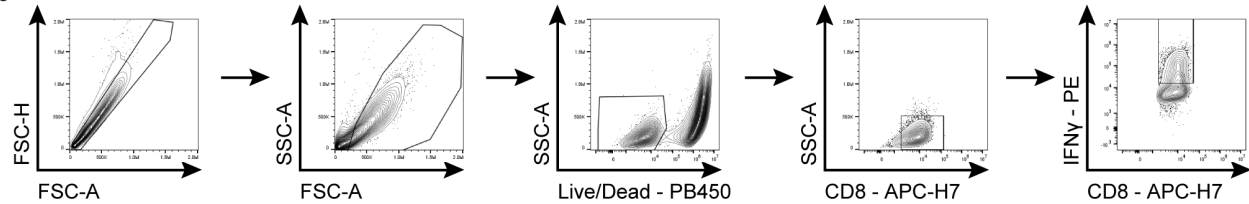

**Supplementary Figure 1.** Gating scheme for T cell co-culture studies with (a) p31 and Eα specific T cells and (b) NRP-V7 specific T cells detailed in **Figure 2**.

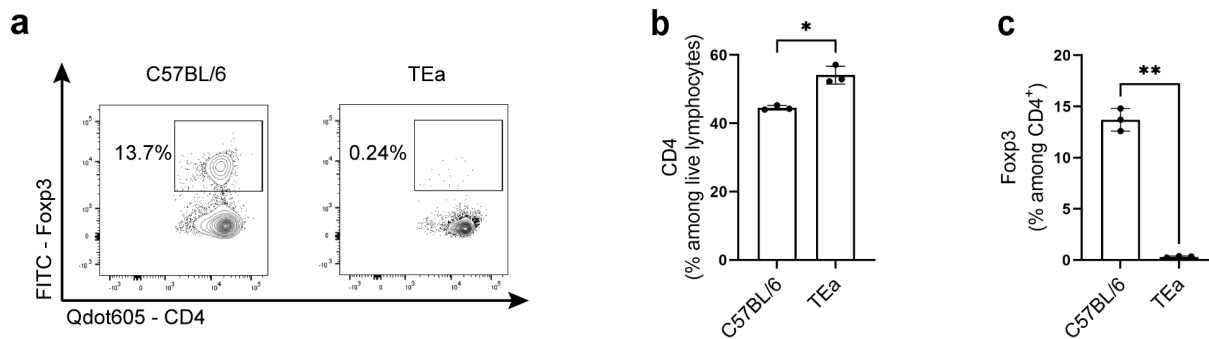

**Supplemental Figure 2. TEa mice have almost no endogenous T<sub>REG</sub>.** Inguinal, axillary and brachial lymph nodes from C57/BL6 and TEa mice were analyzed for T<sub>REG</sub> frequency by flow cytometry. (a) representative flow cytometry plots of CD4 and foxp3 expression. (b) Summary data showing T<sub>REG</sub> frequency in each lymph node. N = 1, and Two tailed Welch's t test was used for statistical comparison of T<sub>REG</sub> frequency. Mean  $\pm$  s.d. is shown \* indicates  $p < 0.05$ , \*\* indicates  $p < 0.01$ , \*\*\* indicates  $p < 0.001$ , \*\*\*\* indicates  $p < 0.0001$

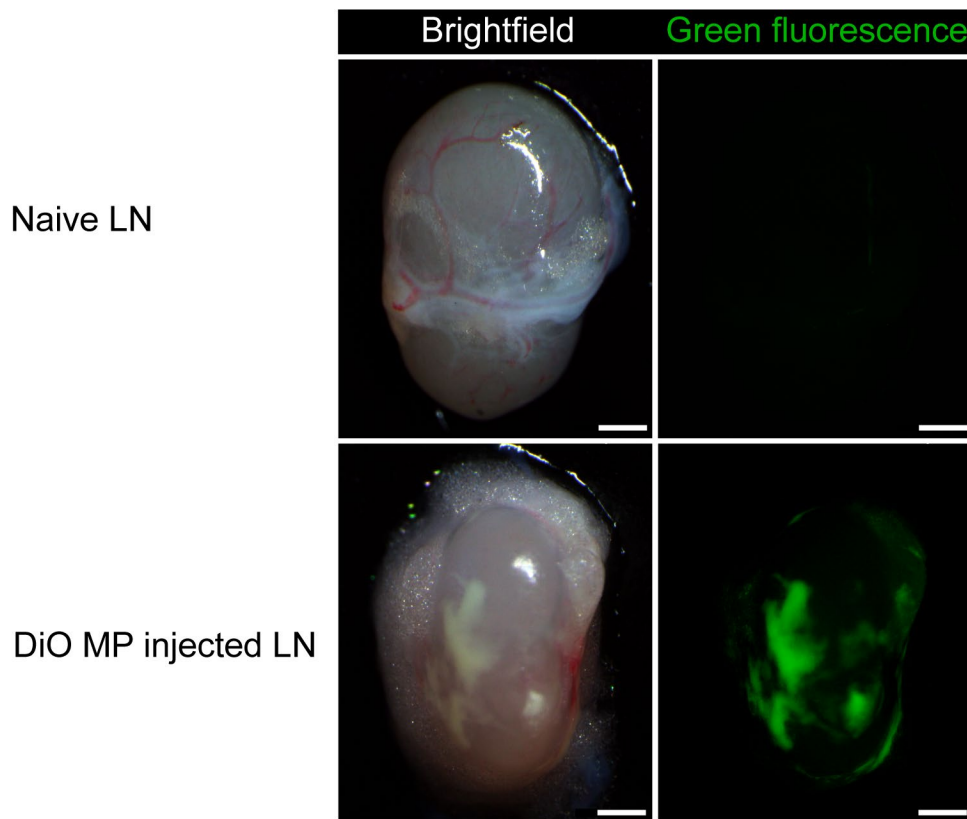

**Supplemental figure 3. 1mg of MPs in 10 $\mu$ L water can be injected into a murine inguinal LN.** An inguinal LN from a NOD mouse was excised and injected with 1mg of DiO labeled MPs in 10 $\mu$ L. Bright field and green fluorescent images of a naïve LN or a DiO MP injected LN are shown. \* indicates  $p < 0.05$ , \*\* indicates  $p < 0.01$ , \*\*\* indicates  $p < 0.001$ , \*\*\*\* indicates  $p < 0.0001$

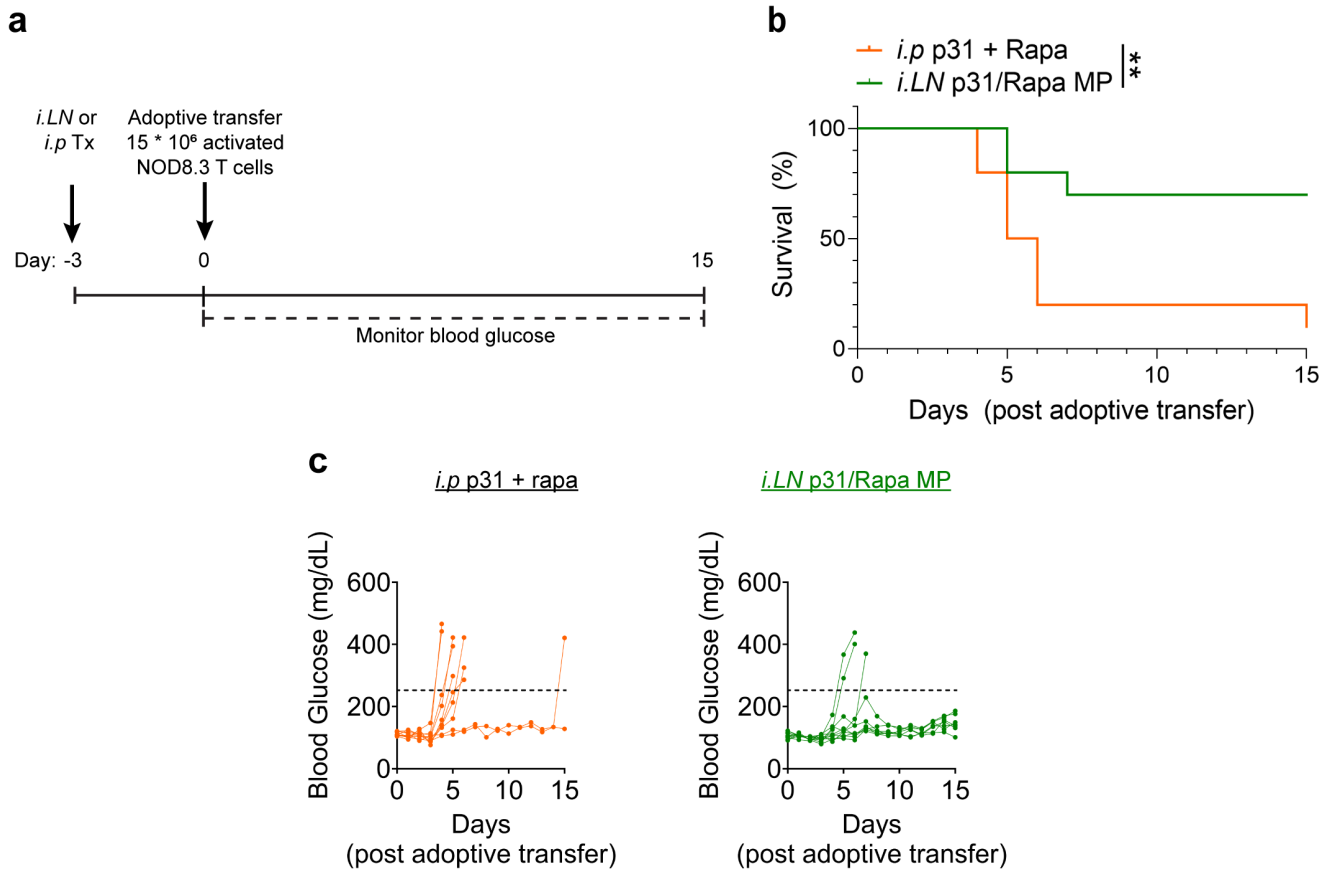

**Supplementary figure 4. i.LN p31/Rapa MPs promote superior tolerance in T1D compared to soluble p31 and Rapa given *i.p.*** (a) Schematic representation of NRP-V7 adoptive transfer induced T1D experiment, where host mice were treated with *i.LN* p31/Rapa MPs, or *i.p* soluble p31 with soluble Rapa. The dose for p31/Rapa MPs was 0.2mg of MPs, which is 1/10<sup>th</sup> of the dose used in all other studies. The dose for p31 was 8µg of Rapa and 2µg of p31 for the *i.p.* treatment. N = 10 for each treatment group. (b) Survival curve indicating percent of mice remaining normoglycemic. (c) Individual blood glucose traces for mice in each group. Two tailed log-rank (Mantel-Cox) was used for all pairwise comparisons between each treatment. \* indicates  $p < 0.05$ , \*\* indicates  $p < 0.01$ , \*\*\* indicates  $p < 0.001$ , \*\*\*\* indicates  $p < 0.0001$

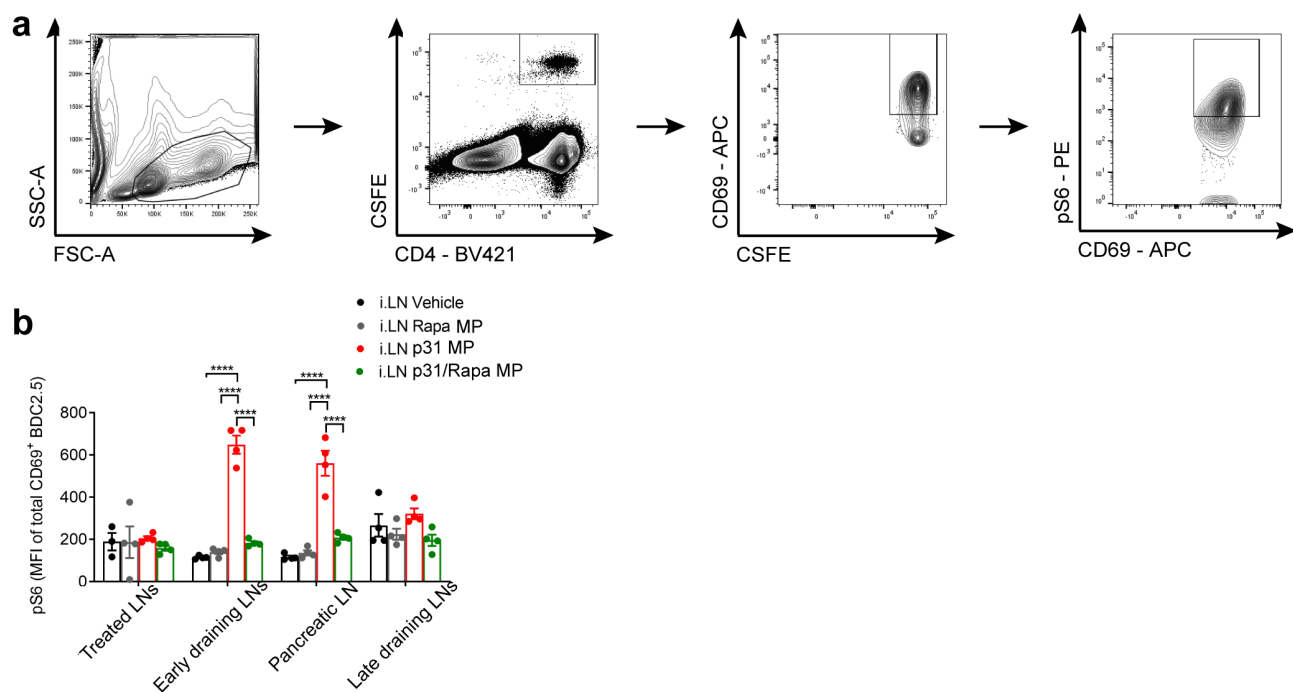

**Supplementary Figure 5.** (a) Gating scheme to analyze CD69 and ps6 expression among p31 specific T cells in the experiment detailed in **Figure 4**. (b) Geometric mean fluorescence intensity of ps6 among p31 specific CD69<sup>+</sup> cells from experiment detailed in **Figure 4a**. \* indicates  $p < 0.05$ , \*\* indicates  $p < 0.01$ , \*\*\* indicates  $p < 0.001$ , \*\*\*\* indicates  $p < 0.0001$

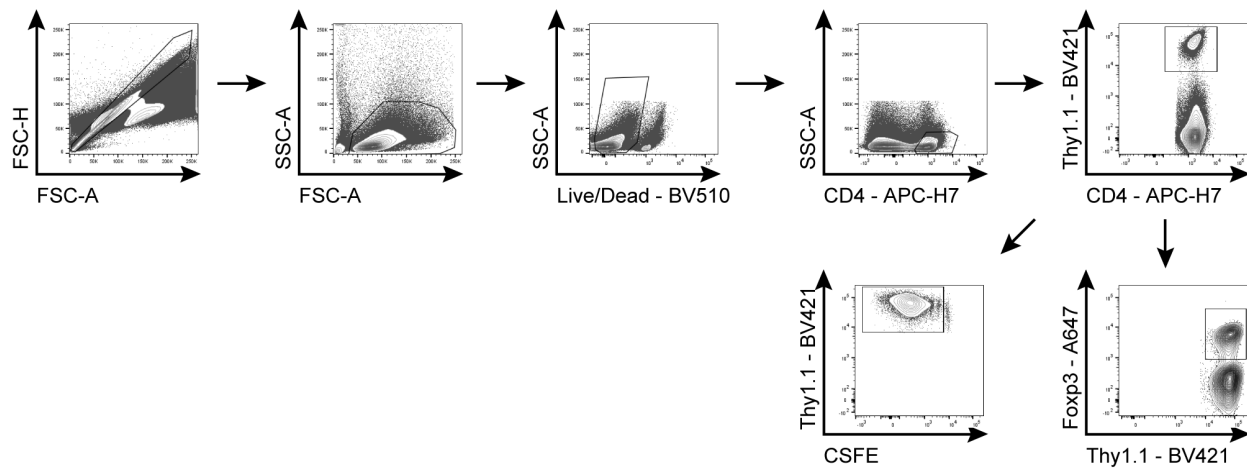

**Supplementary Figure 6.** Gating scheme to analyze Foxp3 expression and CSFE dilution among p31 specific T cells in the experiments detailed in **Figure 5**.

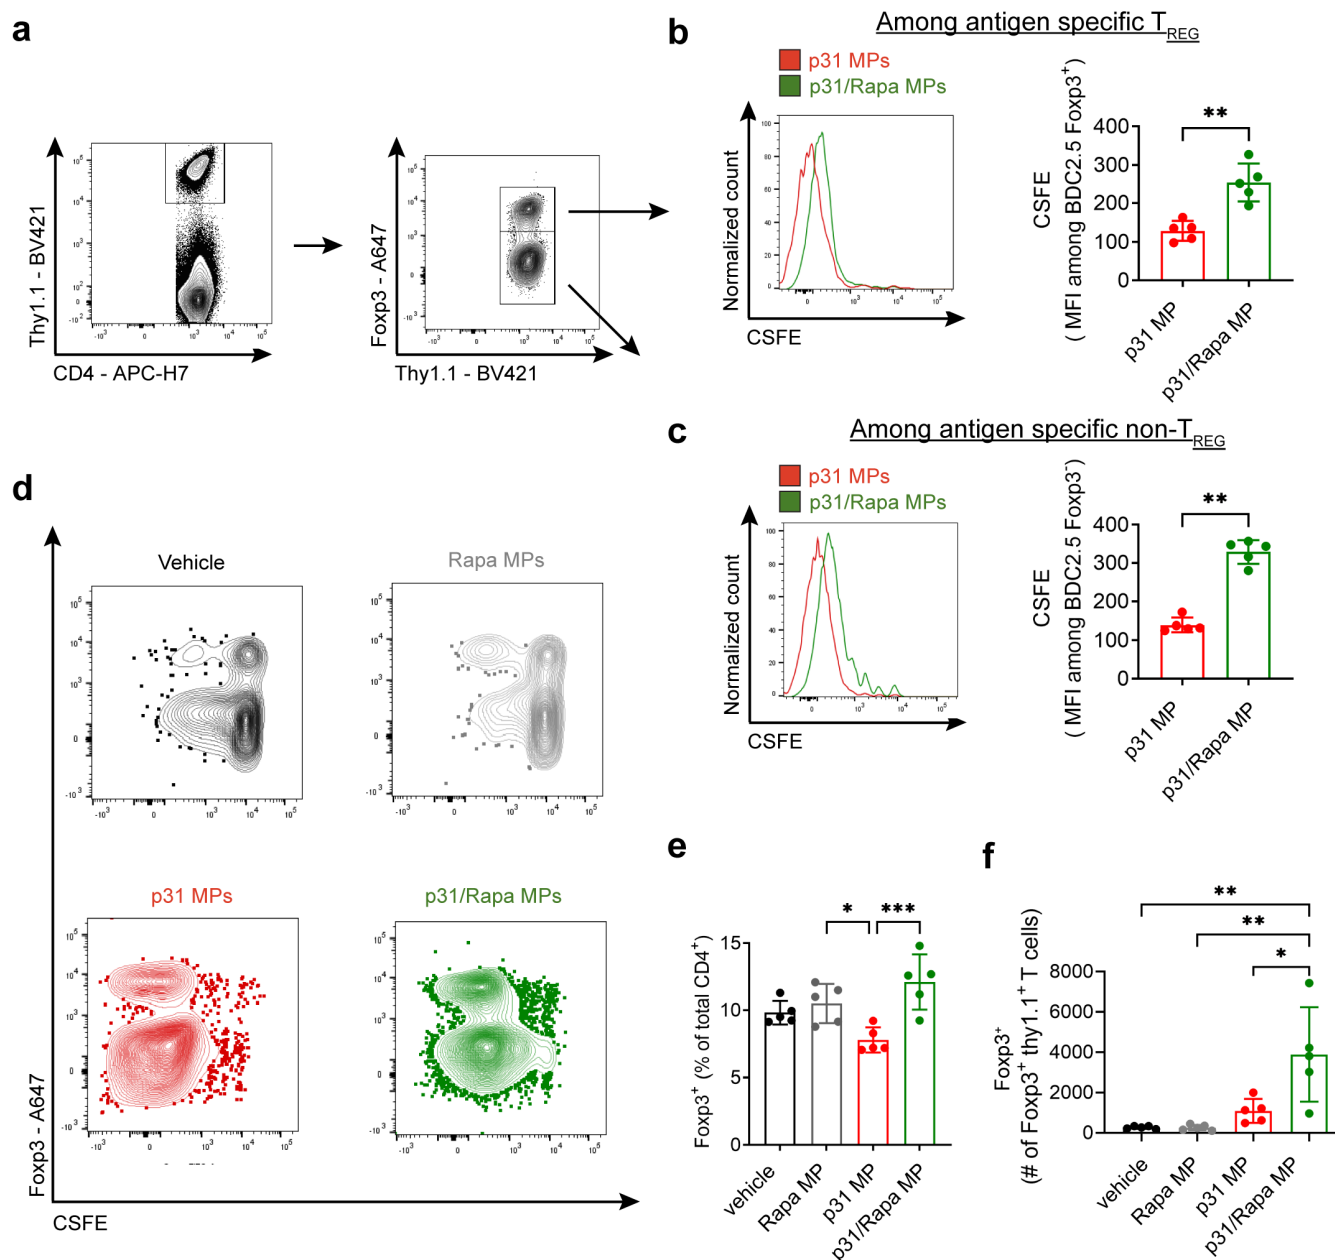

**Supplementary Figure 7.** Experimental details for these data are outlined in **Figure 5**. (a) Gating scheme for analysis shown in (b) and (c). (b) Representative flow cytometry traces showing CSFE dilution and average geometric mean fluorescence intensity among p31-specific T<sub>REG</sub> in treated LNs of mice treated with p31 MP or p31/Rapa MPs. (c) Representative flow cytometry traces showing CSFE dilution and average geometric mean fluorescence intensity among p31-specific non-T<sub>REG</sub> (determined by no Foxp3 expression) from treated LNs of mice treated with p31 MP or p31/Rapa MPs. Two tailed Welch's t test was used to compare p31 MP vs p31/Rapa MP treatment groups. (d) Representative flow cytometry plots of CSFE and Foxp3 fluorescence of antigen-specific CD4 T cells in LNs treated with vehicle, Rapa MP, p31 MP or p31/Rapa MP. (e) Frequency of T<sub>REG</sub> among all CD4 T cells in treated LNs of mice treated LNs. (f) Number of antigen-specific T<sub>REG</sub> in treated LNs. One way ANOVA with Tukey's post hoc test was used to compare treatment groups. \* indicates  $p < 0.05$ , \*\* indicates  $p < 0.01$ , \*\*\* indicates  $p < 0.001$ , \*\*\*\* indicates  $p < 0.0001$



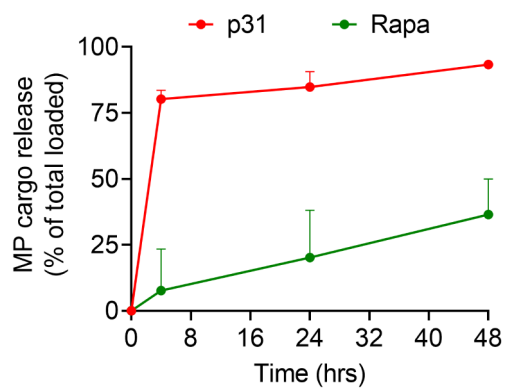

**Supplementary Figure 8. Release kinetics of p31/Rapa Mps.** N = 3 batches of p31/Rapa MPs. The mean  $\pm$  s.d of percentage of total cargo release at each timepoint is shown.

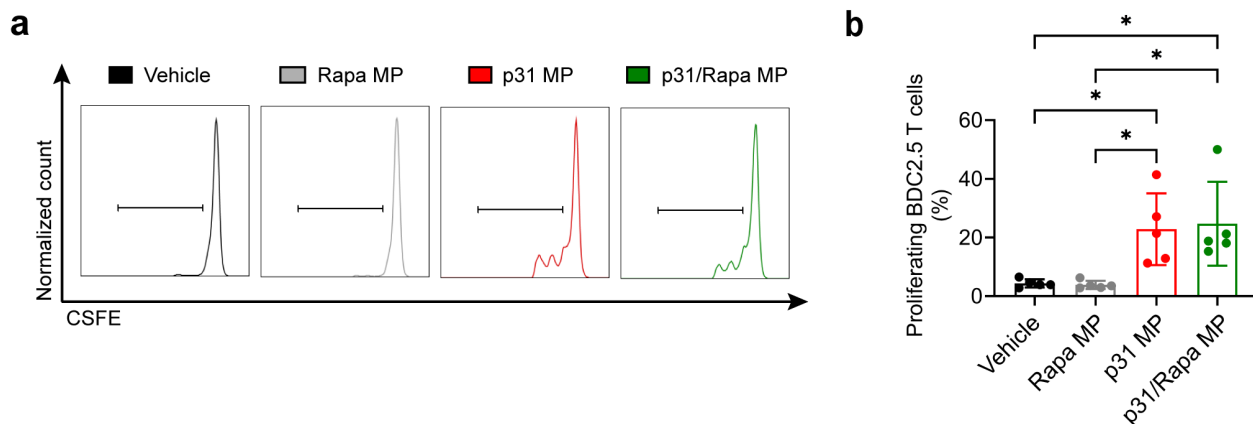

**Supplemental figure 9. MPs loaded with p31 expand antigen-specific T cells in treated LNs when adoptively transferred 3 weeks after MP injection.** NOD mice were injected *i.LN* with vehicle, Rapa MPs, P31 MPs or P31/Rapa MPs, and 3 weeks after treatment CFSE labeled BDC2.5 T cells were adoptively transferred into host NOD mice. 4 days after adoptive transfer, proliferation of transferred T cells in treated LNs was quantified. (a) Representative flow cytometry plots showing proliferation of BDC2.5 T cells in treated LNs by CFSE dilution. (b) Aggregate data showing proliferation of transferred T cells. N = 5 mice for all groups, and paired inguinal LNs were pooled for each mouse. The mean  $\pm$  s.d. is shown. One way ANOVA with Tukey's post hoc test was used to compare each treatment within individual lymph nodes. \* indicates  $p < 0.05$ , \*\* indicates  $p < 0.01$ , \*\*\* indicates  $p < 0.001$ , \*\*\*\* indicates  $p < 0.0001$

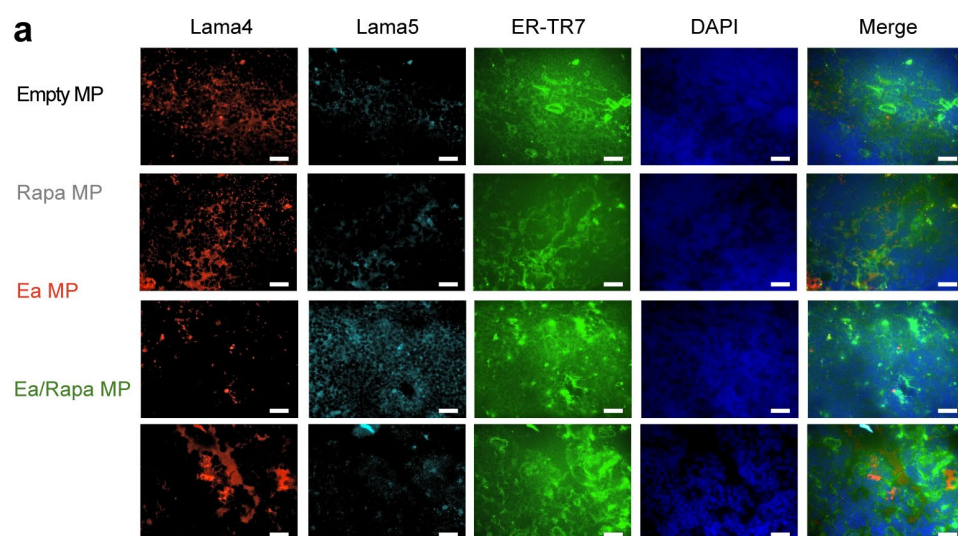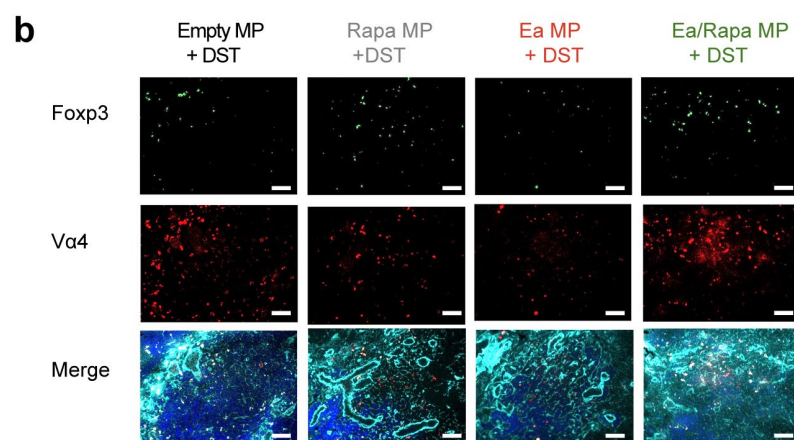

**Supplementary Figure 10.** Representative images including merge of all channels for data summarized in **Figure 7**. (a) corresponds to **Figure 7a-d, 7h-k** (b) corresponds to **Figure 7g-j**.

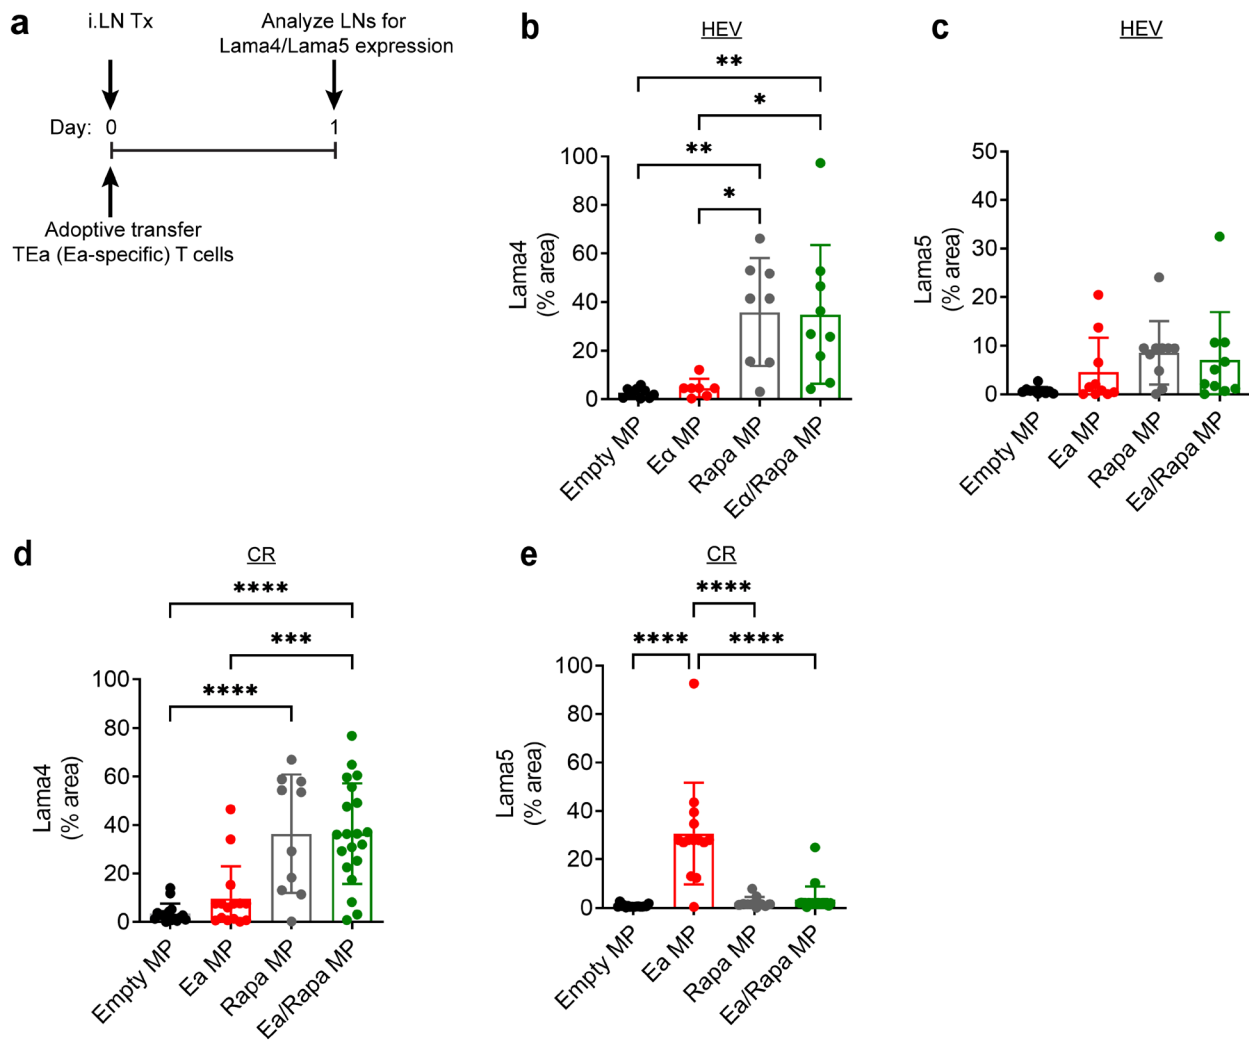

**Supplementary Figure 11.** (a) Schematic representation of experiment summarized in panels b-e. Percent area of laminin α4 in HEVs (c) and CRs (d) of treated LNs from mice treated with indicated groups. Percent area of laminin α5 in HEVs (e) and CRs (f) of treated LNs from mice treated with indicated groups. One way ANOVA with Tukey's post hoc test was used to compare treatment groups. Experimental details for these data are outlined in **Figure 7**. \* indicates  $p < 0.05$ , \*\* indicates  $p < 0.01$ , \*\*\* indicates  $p < 0.001$ , \*\*\*\* indicates  $p < 0.0001$

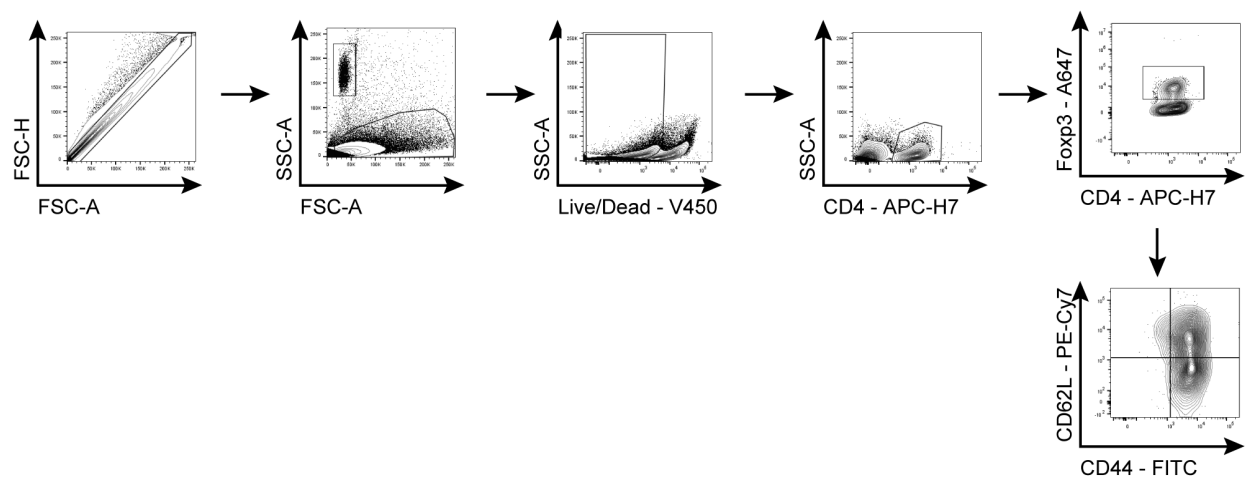

**Supplementary Figure 12.** Gating scheme for data summarized in **Figure 9a-d**.

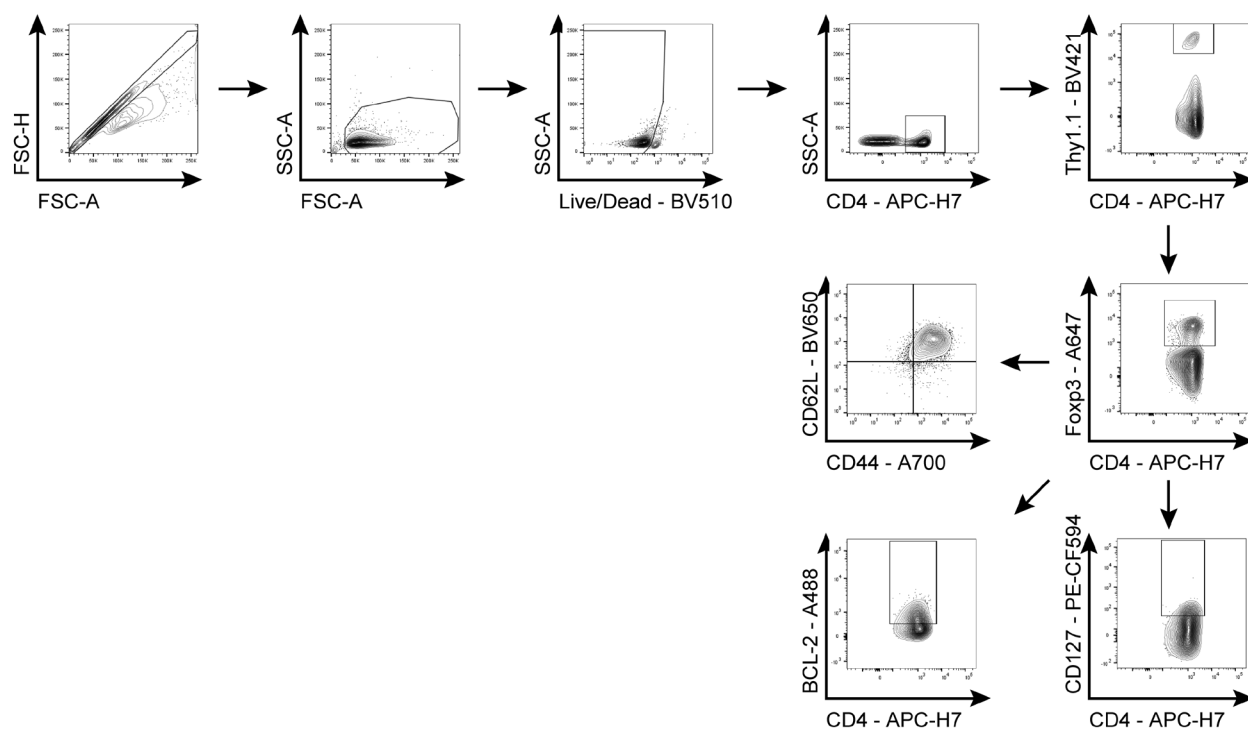

**Supplementary Figure 13.** Gating scheme for data summarized in **Figure 9f-k**.

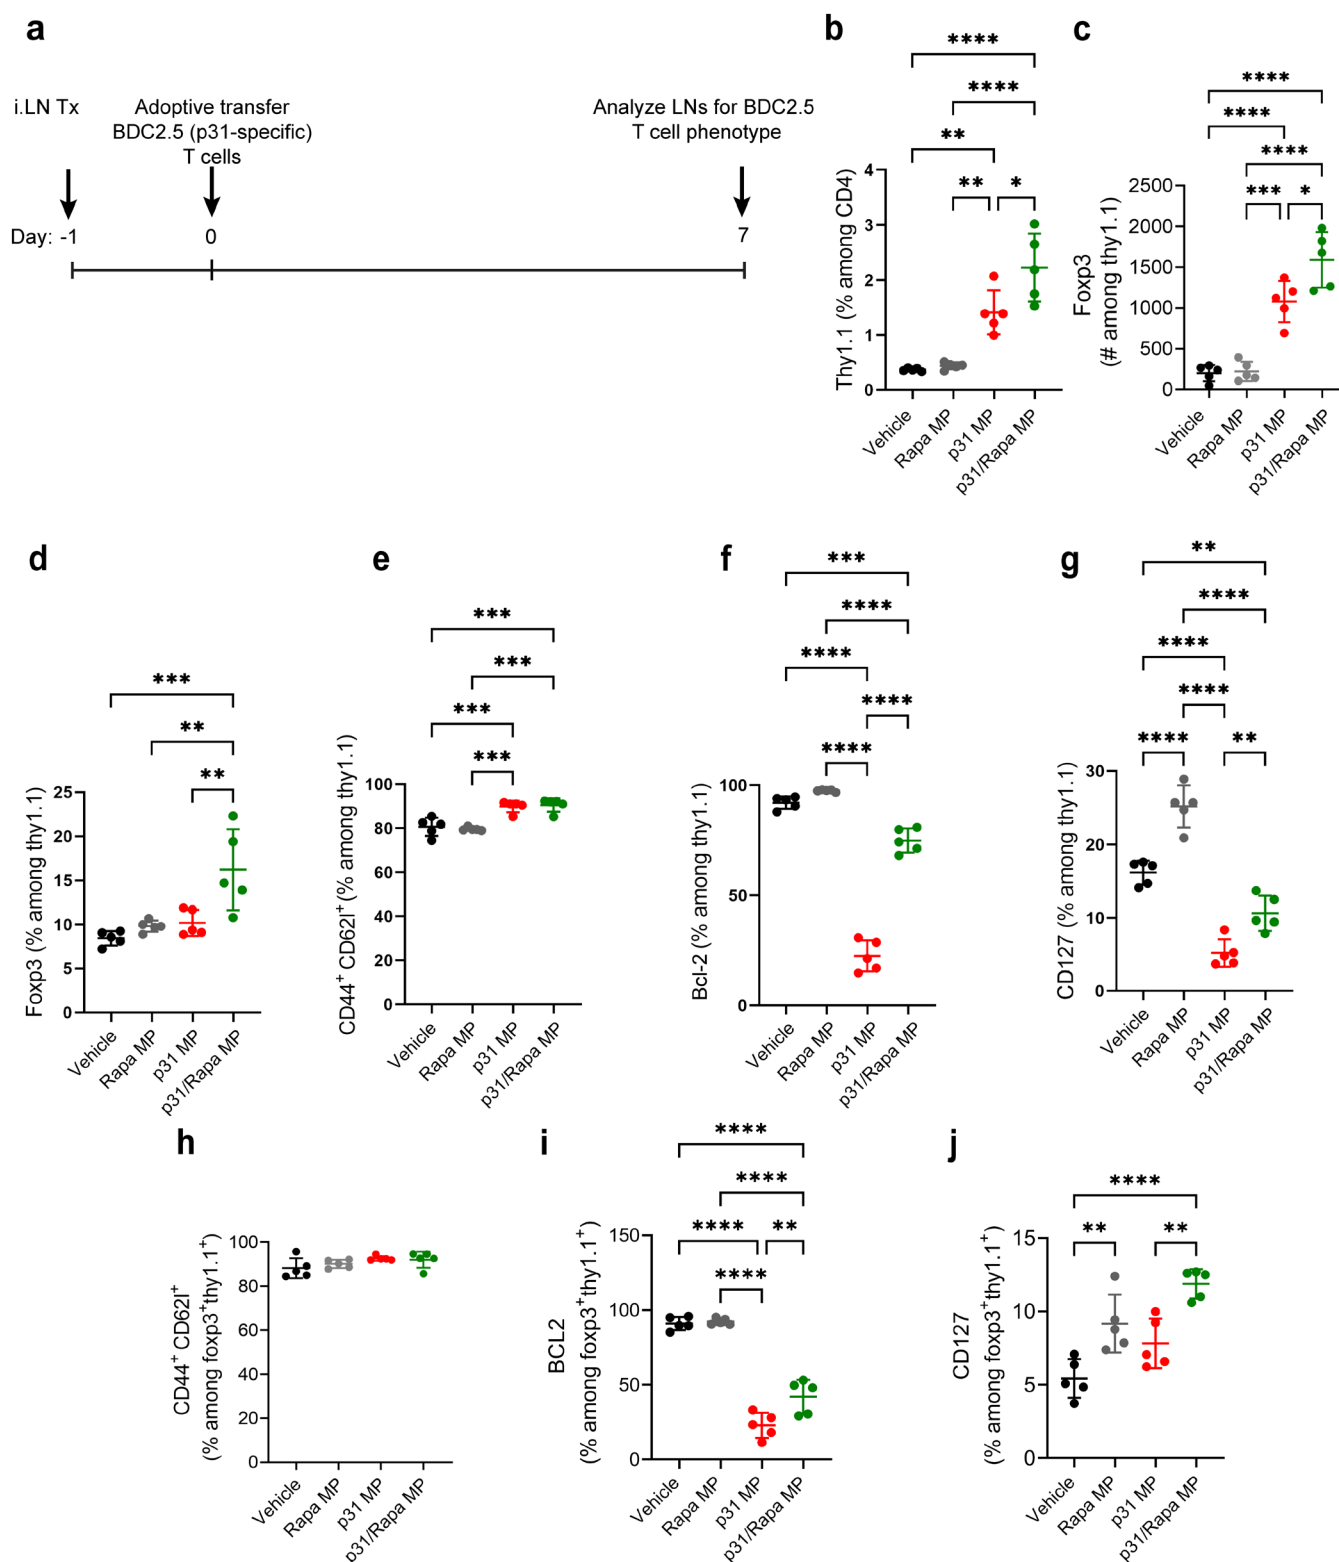

**Supplementary Figure 14.** Experimental details for these data are described in **Figure 9**. (a) Schematic representation of experiment summarized in panels b-j. (b) Frequency of BDC2.5-thy1.1 T cells in treated LNs. Number (c) and frequency (d) of Foxp3 expressing cells among all antigen-specific (BDC2.5-thy1.1) in treated LNs. Frequencies of (e) CD44<sup>+</sup>CD62L<sup>+</sup>, (f) Bcl-2, and (g) CD127 expressing cells among all antigen specific (BDC2.5-thy1.1) in treated LNs. Frequencies of (h) CD44<sup>+</sup>CD62L<sup>+</sup>, (i) Bcl-2, and (j) CD127

156 expressing antigen-specific T<sub>REG</sub> in treated LNs. For panels b-j, one way ANOVA with Tukey's post hoc  
157 test was used to compare treatment groups. \* indicates  $p < 0.05$ , \*\* indicates  $p < 0.01$ , \*\*\* indicates  $p <$   
158  $0.001$ , \*\*\*\* indicates  $p < 0.0001$



166  
167

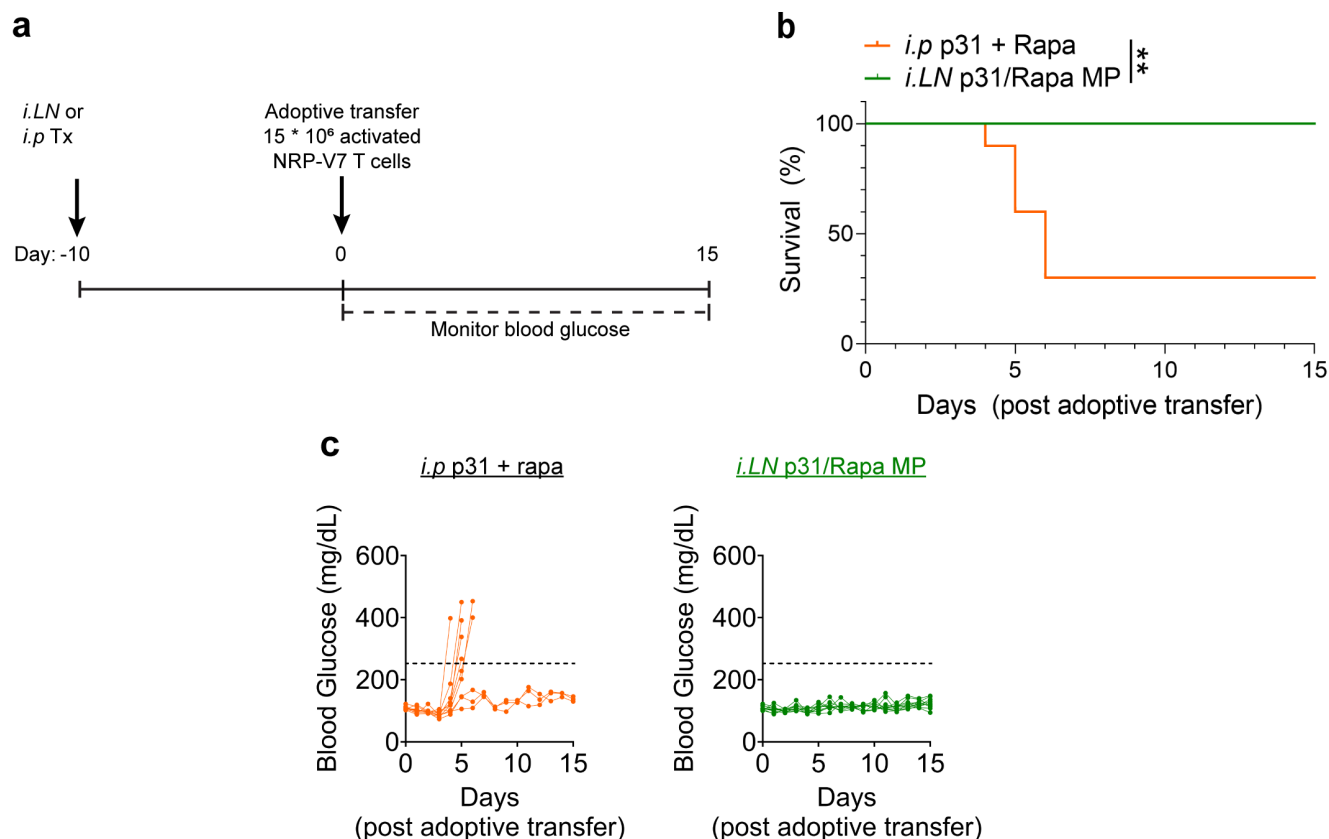

168  
169  
170  
171  
172  
173  
174  
175  
176  
177  
178  
179  
180

**Supplemental figure 15. i.LN p31/Rapa MPs promote durable tolerance in T1D compared to soluble p31 and Rapa given i.p.** (a) Schematic representation of NRP-V7 adoptive transfer induced T1D experiment, where host mice were treated with *i.LN* p31/Rapa MPs, or *i.p* soluble p31 with soluble Rapa 10 days before adoptive transfer of activated NOD8.3 T cells. N = 10 for each treatment group. The dose for p31 was 80µg of Rapa and 20µg of p31 for the *i.p* treatment (b) Survival curve indicating percent of mice remaining normoglycemic. (c) Individual blood glucose traces for mice in each group. Two tailed log-rank (Mantel-Cox) was used for all pairwise comparisons between each treatment. \* indicates  $p < 0.05$ , \*\* indicates  $p < 0.01$ , \*\*\* indicates  $p < 0.001$ , \*\*\*\* indicates  $p < 0.0001$

|             | Diameter<br>( $\mu\text{m}$ ) | p31 loading<br>( $\mu\text{g}$ peptide/mg particle) | NRP-V7 loading<br>( $\mu\text{g}$ peptide/mg particle) | Ea loading<br>( $\mu\text{g}$ peptide/mg particle) | Rapa loading<br>( $\mu\text{g}$ Rapa/mg particle) |
|-------------|-------------------------------|-----------------------------------------------------|--------------------------------------------------------|----------------------------------------------------|---------------------------------------------------|
| Empty       | $3.7 \pm 0.2$                 | N/A                                                 | N/A                                                    | N/A                                                | N/A                                               |
| Rapa        | $3.6 \pm 0.7$                 | N/A                                                 | N/A                                                    | N/A                                                | $39.2 \pm 6.3$                                    |
| p31         | $3.2 \pm 0.2$                 | $7.4 \pm 0.5$                                       | N/A                                                    | N/A                                                | N/A                                               |
| p31/Rapa    | $4.2 \pm 0.1$                 | $8.2 \pm 1.7$                                       | N/A                                                    | N/A                                                | $32.0 \pm 1.9$                                    |
| NRP-V7      | $3.7 \pm 0.2$                 | N/A                                                 | $3.4 \pm 0.2$                                          | N/A                                                | N/A                                               |
| NRP-V7/Rapa | $3.8 \pm 0.5$                 | N/A                                                 | $5.2 \pm 0.8$                                          | N/A                                                | $37.8 \pm 4.8$                                    |
| Ea          | $3.9 \pm 0.9$                 | N/A                                                 | N/A                                                    | $1.8 \pm 1.0$                                      | N/A                                               |
| Ea/Rapa     | $4.0 \pm 1.3$                 | N/A                                                 | N/A                                                    | $1.2 \pm 0.4$                                      | $17.6 \pm 2.0$                                    |

**Supplemental table 1.** Physical properties of microparticles used throughout the studies. Particle size was measured via laser diffraction. Loading of all peptide antigens were measured by microBCA, and loading of rapamycin was measured by UV/vis spectrophotometry and are reported per mass of particles. All measurements are reported as averages of 3 or 4 batches of each particle formulation.

| Statistical comparison                                         | Summary | Adjusted P Value |
|----------------------------------------------------------------|---------|------------------|
| late draining LN Rapa MP vs. late draining LN p31/Rapa MP      | ns      | >0.9999          |
| late draining LN Rapa MP vs. treated LN Rapa MP                | ns      | 0.1794           |
| late draining LN Rapa MP vs. treated LN p31/Rapa MP            | ***     | 0.0006           |
| late draining LN Rapa MP vs. early draining LN Rapa MP         | ns      | 0.5669           |
| late draining LN Rapa MP vs. early draining LN p31/Rapa MP     | **      | 0.0079           |
| late draining LN Rapa MP vs. pancreatic LN Rapa MP             | ns      | 0.7588           |
| late draining LN Rapa MP vs. pancreatic LN p31/Rapa MP         | *       | 0.0179           |
| late draining LN p31/Rapa MP vs. treated LN Rapa MP            | ns      | 0.3406           |
| late draining LN p31/Rapa MP vs. treated LN p31/Rapa MP        | **      | 0.0017           |
| late draining LN p31/Rapa MP vs. early draining LN Rapa MP     | ns      | 0.7934           |
| late draining LN p31/Rapa MP vs. early draining LN p31/Rapa MP | *       | 0.0198           |
| late draining LN p31/Rapa MP vs. pancreatic LN Rapa MP         | ns      | 0.9253           |
| late draining LN p31/Rapa MP vs. pancreatic LN p31/Rapa MP     | *       | 0.0417           |
| treated LN Rapa MP vs. treated LN p31/Rapa MP                  | ns      | 0.1486           |
| treated LN Rapa MP vs. early draining LN Rapa MP               | ns      | 0.9852           |
| treated LN Rapa MP vs. early draining LN p31/Rapa MP           | ns      | 0.7365           |
| treated LN Rapa MP vs. pancreatic LN Rapa MP                   | ns      | 0.9101           |
| treated LN Rapa MP vs. pancreatic LN p31/Rapa MP               | ns      | 0.8732           |
| treated LN p31/Rapa MP vs. early draining LN Rapa MP           | *       | 0.0218           |
| treated LN p31/Rapa MP vs. early draining LN p31/Rapa MP       | ns      | 0.9415           |
| treated LN p31/Rapa MP vs. pancreatic LN Rapa MP               | **      | 0.009            |
| treated LN p31/Rapa MP vs. pancreatic LN p31/Rapa MP           | ns      | 0.9073           |
| early draining LN Rapa MP vs. early draining LN p31/Rapa MP    | ns      | 0.2379           |
| early draining LN Rapa MP vs. pancreatic LN Rapa MP            | ns      | >0.9999          |
| early draining LN Rapa MP vs. pancreatic LN p31/Rapa MP        | ns      | 0.3954           |
| early draining LN p31/Rapa MP vs. pancreatic LN Rapa MP        | ns      | 0.1207           |
| early draining LN p31/Rapa MP vs. pancreatic LN p31/Rapa MP    | ns      | >0.9999          |
| pancreatic LN Rapa MP vs. pancreatic LN p31/Rapa MP            | ns      | 0.2295           |

**Supplemental table 2. Statistical comparisons of frequencies of antigen-specific T<sub>REG</sub> in mice treated with Rapa MPs and mice treated with p31/Rapa MPs in treated and all untreated lymph nodes.** One way ANOVA with Tukey's post test used to compare treatment groups. This table relates to **Figure 5** in the main text.
